# Supplementary material for: Preparation of high-quality graphene sheets and their applications in highly conductive papers and a high-performance electromechanical actuator
Source: Royal Society of Chemistry journal article supplement (doi:10.1039/c3tc31014k), 2013-01-01
Supplement: c3tc31014k.pdf [file c3tc31014k.pdf]

## Electronic Supplementary Material

|                                                                                                                                       |   |
|---------------------------------------------------------------------------------------------------------------------------------------|---|
| 1. Figure S1. XPS spectrum of exfoliated graphene sheets.....                                                                         | 2 |
| 2. Figure S2. Dependence of the UV–vis absorbance on the concentration of the exfoliated graphene sheets.....                         | 3 |
| 3. Figure S3. UV–vis absorption spectrum of the BMIBF <sub>4</sub> ionic liquid.....                                                  | 4 |
| 4. Figure S4. Tyndall effect confirming the colloidal nature of the exfoliated graphene dispersions after standing for one month..... | 5 |
| 5. Figure S5. FE-SEM image for the surface of the filtered graphene paper.....                                                        | 6 |
| 6. Figure S6. Electrical conductivity of the filtered graphene paper.....                                                             | 7 |
| 7. Figure S7. XRD patterns for the expanded HOPG.....                                                                                 | 8 |

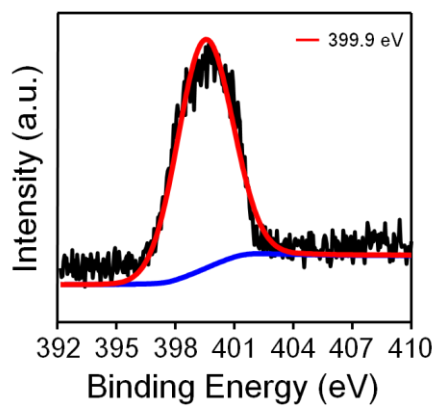

**Figure S1.** XPS spectra of exfoliated graphene sheets. Presence of N 1s confirms functionalization of the exfoliated graphene sheets by BMIBF<sub>4</sub>.

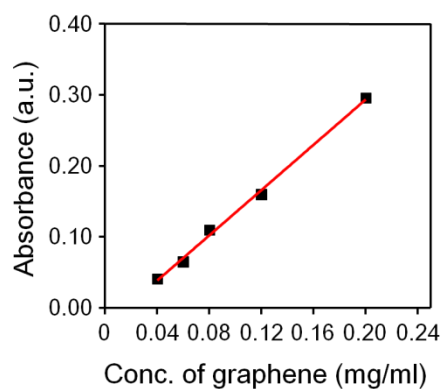

**Figure S2.** Dependence of the UV-vis absorbance on the concentration of exfoliated graphene sheets: 0.04, 0.06, 0.08, 0.12, and 0.20 mg mL<sup>-1</sup>. The reference solution used was the BMIBF<sub>4</sub> ionic liquid.

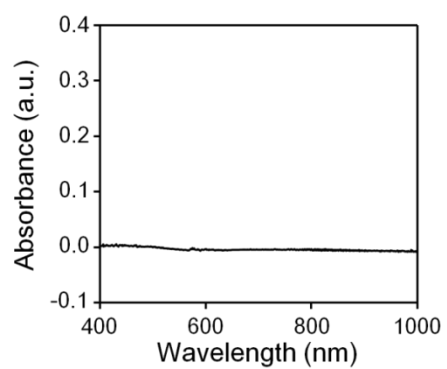

**Figure S3.** UV-vis absorption spectrum of the BMIBF<sub>4</sub> ionic liquid (the reference solution used was neat BMIBF<sub>4</sub>).

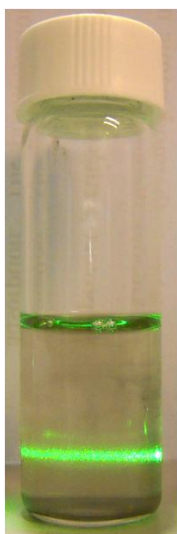

**Figure S4.** Tyndall effect confirming the colloidal nature of the exfoliated graphene dispersions after standing for one month.

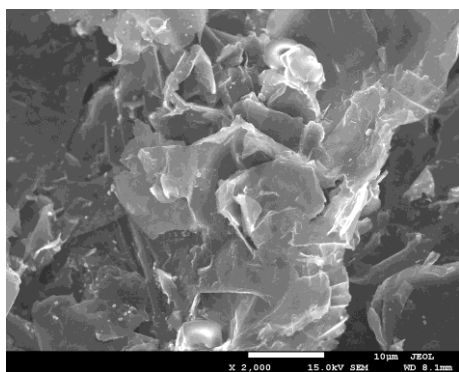

**Figure S5.** FE-SEM image for the surface of the filtered graphene paper.

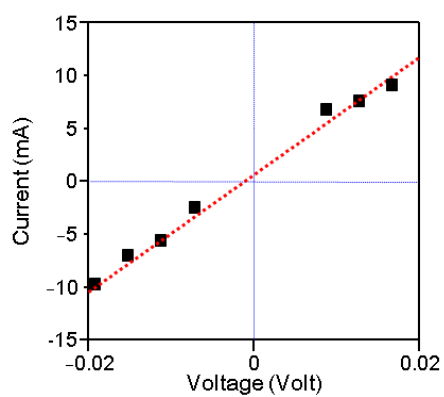

**Figure S6.** Electrical conductivity of the filtered graphene paper.

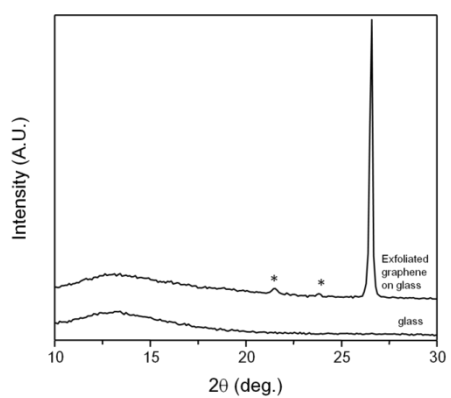

**Figure S7.** XRD patterns for the expanded HOPG.
